# Supplementary material
Source: Frontiers journal article supplement (https://www.frontiersin.org/articles/521213)
Supplement: Image_1.pdf [file Image_1.pdf]

## APPENDIX

### A. Original CT-DRAGON score versus CT-DRAGON score in the study

| Original DRAGON score                                                                 | CT-DRAGON score in the study                                                                                                                  |
|---------------------------------------------------------------------------------------|-----------------------------------------------------------------------------------------------------------------------------------------------|
| (Hyper)dense cerebral artery sign on admission CT head scan: no or yes (0 or 1 point) | Thrombus of the internal carotid, middle cerebral (M1 or M2), basilar or vertebral artery on admission CT head scan: no or yes (0 or 1 point) |
| Early infarct signs on admission CT head scan: no or yes (0 or 1 point)               | ASPECTS <10 or early infarct signs on admission CT head scan: no or yes (0 or 1 point)                                                        |
| Pre-stroke modified Rankin Scale score >1: no or yes (0 or 1 point)                   | =                                                                                                                                             |
| Age: <65, 65-79 or >79 years (0, 1 or 2 points)                                       | =                                                                                                                                             |
| Glucose level on admission: $\leq 8$ mmol/L or $> 8$ mmol/L (0 or 1 point)            | =                                                                                                                                             |
| Time onset stroke to treatment: $\leq 90$ or $> 90$ minutes (0 or 1 point)            | Time onset stroke to emergency department admission: $\leq 90$ or $> 90$ minutes (0 or 1 point)                                               |
| NIHSS on admission: 0-4, 5-9, 10-15 or $> 15$ (0, 1, 2 or 3 points)                   | =                                                                                                                                             |

## B. Definition of localisations

| Localisation              | Imaging                                                                                                                                                  |
|---------------------------|----------------------------------------------------------------------------------------------------------------------------------------------------------|
| Anterior                  | <ul style="list-style-type: none"><li>• Thrombus in the internal carotid artery or</li><li>• Thrombus in the middle cerebral artery (M1 or M2)</li></ul> |
| Posterior proximally      | <ul style="list-style-type: none"><li>• Thrombus in the basilar artery or</li><li>• Thrombus in the vertebral artery</li></ul>                           |
| Lacunar                   | Infarction with absence of thrombus in the internal carotid, middle cerebral (M1 or M2), basilar or vertebral artery.                                    |
| No large vessel occlusion | No infarction                                                                                                                                            |

C. Recoding to obtain complete case group

| Parameters of the CT-DRAGON score                     | Recode missings as |
|-------------------------------------------------------|--------------------|
| ASPECTS/early infarct signs on admission CT head scan | 0                  |
| Pre-stroke modified Rankin Scale score                | 0                  |
| Glucose level on admission                            | 0                  |
| Time onset stroke to emergency department admission   | 1                  |
| NIHSS on admission                                    | 0                  |

D. Patient baseline characteristics of the training versus the validation cohort

|                                                        | Training cohort | Validation cohort |
|--------------------------------------------------------|-----------------|-------------------|
| N = 564                                                |                 |                   |
| Age years, mean (SD)                                   | 74 (13)         | 73 (14)           |
| Sex, n (%)                                             |                 |                   |
| Male                                                   | 228 (54)        | 68 (49)           |
| NIHSS, median (IQR)                                    | 6 (3-15)        | 6 (3-14)          |
| Glycemia, mg/dL, mean (SD)                             | 129 (46)        | 126 (39)          |
| Time onset stroke to ED admission, hours, median (IQR) | 1.6 (0.9-3.8)   | 1.9 (0.8-3.8)     |
| Pre-stroke mRS, median (IQR)                           |                 |                   |
| >1, n (%)                                              | 98 (25)         | 32 (25)           |
| ASPECTS, n (%)                                         |                 |                   |
| <10                                                    | 108 (33)        | 41 (38)           |
| 10                                                     | 223 (67)        | 66 (62)           |
| Early infarct signs, n (%)                             |                 |                   |
| Yes                                                    | 29 (35)         | 10 (36)           |
| No                                                     | 53 (65)         | 18 (64)           |
